# Supplementary material for: Element Contents in Three Commercially Important Edible Mollusks Harvested off the Southwestern Coast of Crimea (Black Sea) and Assessment of Human Health Risks from Their Consumption
Source: MDPI journal article supplement (doi:10.3390/foods10102313), 2021-09-29
Supplement: s1 [file s1]

## Supplementary Material

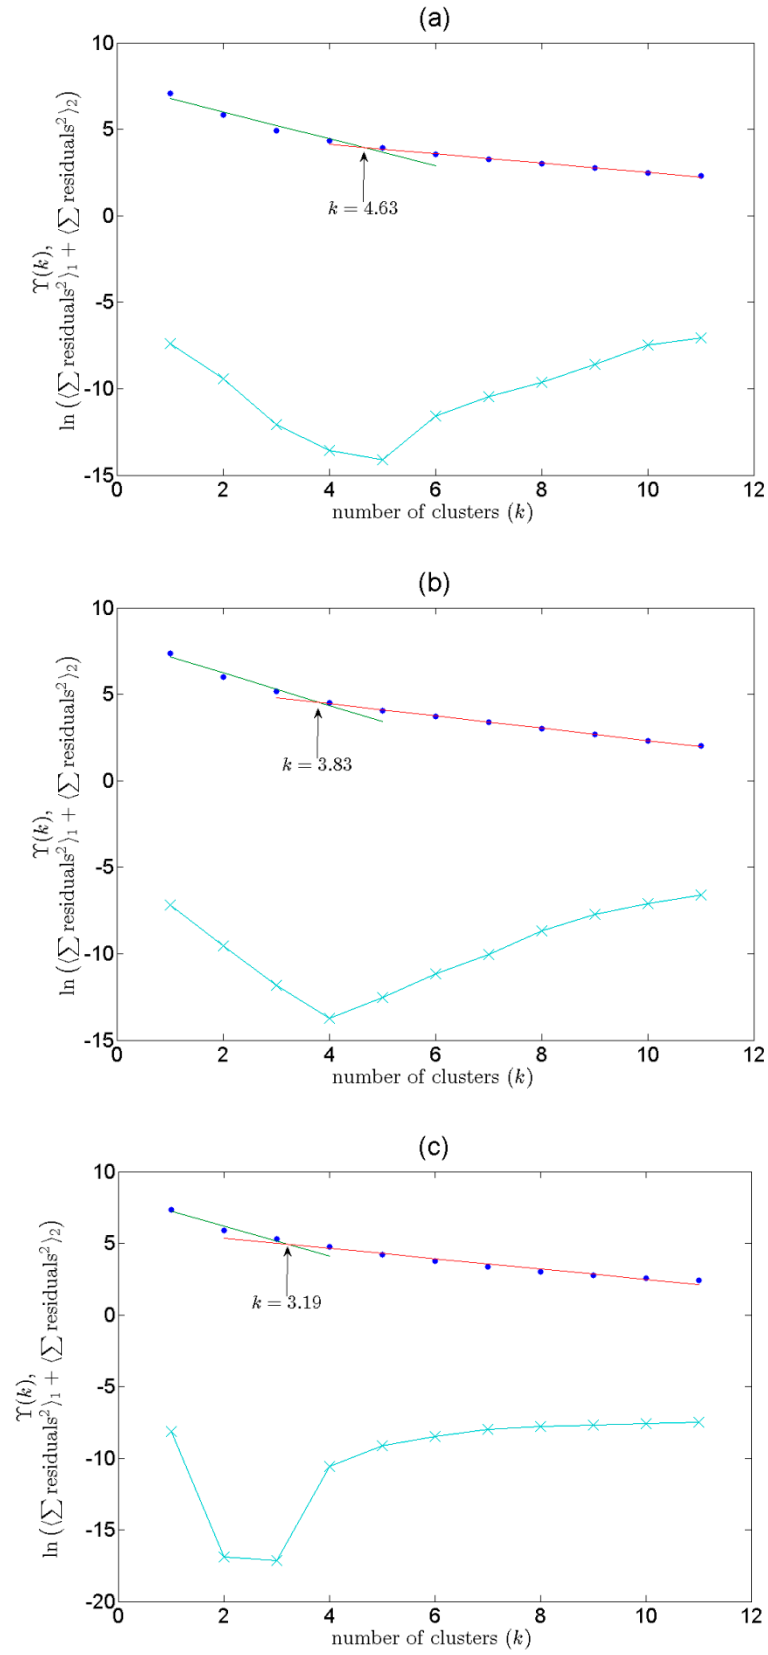

**Figure S1.** Finding the optimum number of non-overlapping clusters from the logarithm of summed distances to centroids ( $Y(k)$ , dots) using two piecewise linear fits and minimum in the mean summed residuals (crosses) for (a) *M. galloprovincialis*, (b) *R. venosa*, and (c) *C. gigas*.

**Table S1.** Parameters used for finding correlations between the mollusk consumption rate (CR) and GDP·PD·L where GDP is the gross domestic product per capita at purchasing power parity, PD is population density, and L is the coastline length (see Section 3.3).

|              | L, km  | GDP, \$  | PD, km <sup>-2</sup> | GDP·PD·L, ×10 <sup>9</sup> \$·year <sup>-1</sup> ·km <sup>-1</sup> | CR, g·capita <sup>-1</sup> ·day <sup>-1</sup> |
|--------------|--------|----------|----------------------|--------------------------------------------------------------------|-----------------------------------------------|
| Belgium      | 66.5   | 45498.35 | 363.25               | 1.10                                                               | 11.254                                        |
| Bulgaria     | 354    | 7332.21  | 67.72                | 0.18                                                               | 0.474                                         |
| China        | 14500  | 5473.68  | 142.63               | 11.32                                                              | 22.666                                        |
| Croatia      | 1777.3 | 14006.45 | 76.50                | 1.90                                                               | 3.314                                         |
| Cyprus       | 648    | 30434.12 | 121.52               | 2.40                                                               | 2.314                                         |
| Denmark      | 7314   | 59531.40 | 134.47               | 58.55                                                              | 4.574                                         |
| Egypt        | 2450   | 2852.28  | 85.04                | 0.59                                                               | 0.202                                         |
| France       | 4853   | 41894.42 | 119.34               | 24.26                                                              | 19.924                                        |
| Georgia      | 310    | 3824.65  | 65.80                | 0.08                                                               | 0.41                                          |
| Greece       | 13676  | 25332.50 | 85.87                | 29.75                                                              | 2.468                                         |
| Israel       | 273    | 32179.78 | 359.01               | 3.15                                                               | 0.834                                         |
| Italy        | 7600   | 36456.53 | 202.30               | 56.05                                                              | 11.806                                        |
| Lebanon      | 245    | 7734.64  | 516.55               | 0.98                                                               | 0.974                                         |
| Malaysia     | 4675   | 9704.00  | 87.13                | 3.95                                                               | 6.786                                         |
| Malta        | 252.8  | 22667.34 | 1305.78              | 7.48                                                               | 11.684                                        |
| Montenegro   | 293.5  | 6903.55  | 46.09                | 0.09                                                               | 2.972                                         |
| Portugal     | 1793   | 22191.47 | 115.01               | 4.58                                                               | 11.678                                        |
| Romania      | 256    | 8783.27  | 87.63                | 0.20                                                               | 0.168                                         |
| Russia       | 37653  | 12988.88 | 8.74                 | 4.27                                                               | 1.2                                           |
| Slovenia     | 46.6   | 23887.72 | 101.85               | 0.11                                                               | 2.166                                         |
| South Korea  | 2413   | 23995.37 | 513.02               | 29.70                                                              | 28.56                                         |
| Spain        | 4964   | 30313.12 | 93.27                | 14.03                                                              | 17.924                                        |
| Thailand     | 3219   | 5362.06  | 132.15               | 2.28                                                               | 6.118                                         |
| Turkey       | 7200   | 11135.34 | 95.56                | 7.66                                                               | 1.372                                         |
| Ukraine      | 2782   | 3392.60  | 78.96                | 0.75                                                               | 2.062                                         |
| Vietnam      | 3444   | 1536.42  | 286.70               | 1.52                                                               | 4.852                                         |
| Crimea, 2017 | 945    | 5385.76  | 87.15                | 0.44                                                               | -                                             |

**Table S2.** Statistical comparison of the linear fits for all selected countries and those with the lower consumption rates correlated with GDP·PD·L.

| Comparison of Fits                | A (all CR)           | B (lower CR)         | Global (shared)                   |
|-----------------------------------|----------------------|----------------------|-----------------------------------|
| Null hypothesis                   |                      |                      | One curve for all data sets       |
| Alternative hypothesis            |                      |                      | Different curve for each data set |
| P value                           |                      |                      | <0.0001                           |
| Conclusion (alpha = 0.05)         |                      |                      | Reject null hypothesis            |
| Preferred model                   |                      |                      | Different curve for each data set |
| F (DFn, DFd)                      |                      |                      | 45.07 (2, 28)                     |
| Different curve for each data set |                      |                      |                                   |
| Best-fit values                   |                      |                      |                                   |
| Slope                             | 1.281                | 1.300                |                                   |
| Yintercept                        | 0.9047               | 0.1679               |                                   |
| 95% CI (profile likelihood)       |                      |                      |                                   |
| Slope                             | -0.06791 to 2.630    | -0.8868 to 3.487     |                                   |
| Yintercept                        | 0.7656 to 1.044      | 0.04595 to 0.2899    |                                   |
| Goodness of Fit                   |                      |                      |                                   |
| Degrees of Freedom                | 17                   | 11                   |                                   |
| R squared                         | 0.9172               | 0.4549               |                                   |
| Sum of Squares                    | 94.71                | 107.7                |                                   |
| Sy.x                              | 2.360                | 3.128                |                                   |
| One curve for all data sets       |                      |                      |                                   |
| Best-fit values                   |                      |                      |                                   |
| Slope                             | 0.3519               | 0.3519               | 0.3519                            |
| Yintercept                        | 2.328                | 2.328                | 2.328                             |
| 95% CI (profile likelihood)       |                      |                      |                                   |
| Slope                             | 0.1907 to 0.5131     | 0.1907 to 0.5131     | 0.1907 to 0.5131                  |
| Yintercept                        | 0.1268 to 4.529      | 0.1268 to 4.529      | 0.1268 to 4.529                   |
| Goodness of Fit                   |                      |                      |                                   |
| Degrees of Freedom                |                      |                      | 30                                |
| R squared                         | 0.5208               | 0.5476               | 0.3984                            |
| Sum of Squares                    | 548.1                | 305.7                | 853.8                             |
| Sy.x                              |                      |                      | 5.335                             |
| Constraints                       |                      |                      |                                   |
| Slope                             | Slope is shared      | Slope is shared      |                                   |
| Yintercept                        | Yintercept is shared | Yintercept is shared |                                   |
| Number of points                  |                      |                      |                                   |
| # of X values                     | 28                   | 28                   |                                   |
| # Y values analyzed               | 19                   | 13                   |                                   |

**Table S3.** Tolerable daily intakes (in  $\text{mg}\cdot\text{kg}^{-1}\text{body weight}\cdot\text{day}^{-1}$ ) of the elements set by the US Environmental Protection Agency (RfD<sub>0</sub>), World Health Organization (PTDI), and European Food Safety Authority (UDI) and their estimated daily intakes (EDI, in  $\text{mg}\cdot\text{kg}^{-1}\text{body weight}\cdot\text{day}^{-1}$ ) with the three edible mollusk species according to the pessimistic (EDI<sub>1</sub>) and optimistic (EDI<sub>2</sub>) scenarios. EDI are presented as expected and (in parentheses) maximum values. The minimum values in all the cases are 0. The estimated daily intakes exceeding any of the tolerable levels are emphasized in bold.

|                 | RfD <sub>0</sub> | PTDI                | UDI    | EDI <sub>1</sub> (mussel) | EDI <sub>2</sub> (mussel) | EDI <sub>1</sub> (sea) | EDI <sub>2</sub> (sea) | EDI <sub>1</sub> (oyster) | EDI <sub>2</sub> (oyster) |
|-----------------|------------------|---------------------|--------|---------------------------|---------------------------|------------------------|------------------------|---------------------------|---------------------------|
| Li              | 2E-3             |                     |        | 6.3E-7 (2.8E-6)           | 3.3E-7 (9.5E-7)           | 1.8E-7 (7.2E-7)        | 8.4E-8 (2.4E-7)        | 5.8E-7 (2.3E-6)           | 2.7E-7 (7.8E-7)           |
| Be              | 2E-3             | 2.9E-4              |        | 4.7E-8 (2.1E-7)           | 2.5E-8 (7.1E-8)           | 4.3E-8 (1.7E-7)        | 2.0E-8 (5.8E-8)        | 6.6E-8 (2.7E-7)           | 3.2E-8 (9.0E-8)           |
| B               | 2E-1             | 2.7E-2              | 2.0E-2 | 1.0E-4 (4.7E-4)           | 5.5E-5 (1.6E-4)           | 1.9E-4 (7.7E-4)        | 9.0E-5 (2.6E-4)        | 4.3E-5 (1.8E-4)           | 2.1E-5 (5.9E-5)           |
| F               | 6E-2             |                     | 1.0E-1 | 9.5E-3 (4.3E-2)           | 5.0E-3 (1.4E-2)           | 1.5E-3 (6.0E-3)        | 7.1E-4 (2.0E-3)        | 5.0E-4 (2.0E-3)           | 2.4E-4 (6.8E-4)           |
| Al              | 1E+0             | 2.9E-1              | 1.4E-1 | 1.9E-2 (8.5E-2)           | 9.9E-3 (2.8E-2)           | 8.2E-2 (3.3E-1)        | 3.9E-2 (1.1E-1)        | 3.2E-3 (1.3E-2)           | 1.5E-3 (4.4E-3)           |
| V               | 5E-3             |                     |        | 7.2E-6 (3.2E-5)           | 3.8E-6 (1.1E-5)           | 3.5E-6 (1.4E-5)        | 1.6E-6 (4.7E-6)        | 8.1E-7 (3.3E-6)           | 3.9E-7 (1.1E-6)           |
| Mn              | 1.4E-1           |                     |        | 4.0E-5 (1.8E-4)           | 2.1E-5 (6.0E-5)           | 5.2E-5 (2.1E-4)        | 2.5E-5 (7.1E-5)        | 1.4E-5 (5.6E-5)           | 6.5E-6 (1.9E-5)           |
| Fe              | 7E-1             | 8.0E-1              |        | 1.2E-3 (5.6E-3)           | 6.5E-4 (1.9E-3)           | 5.2E-3 (2.1E-2)        | 2.5E-3 (7.0E-3)        | 5.3E-4 (2.2E-3)           | 2.5E-4 (7.3E-4)           |
| Co              | 3E-4             |                     | 2.3E-4 | 4.1E-6 (1.8E-5)           | 2.1E-6 (6.1E-6)           | 5.7E-7 (2.3E-6)        | 2.7E-7 (7.8E-7)        | 1.3E-7 (5.4E-7)           | 6.3E-8 (1.8E-7)           |
| Ni              | 2E-2             | 3.1E-3              | 4.0E-4 | 3.3E-5 (1.5E-4)           | 1.7E-5 (4.9E-5)           | 9.2E-6 (3.8E-5)        | 4.4E-6 (1.3E-5)        | 1.3E-6 (5.4E-6)           | 6.3E-7 (1.8E-6)           |
| Cu              | 4E-2             | 5.0E-1              | 7.1E-2 | 4.5E-5 (2.0E-4)           | 2.4E-5 (6.8E-5)           | 1.8E-4 (7.2E-4)        | 8.4E-5 (2.4E-4)        | 2.9E-3 (1.2E-2)           | 1.4E-3 (4.0E-3)           |
| Zn              | 3E-1             | 1.0E+0              | 3.6E-1 | 1.9E-3 (8.7E-3)           | 1.0E-3 (2.9E-3)           | 1.1E-3 (4.6E-3)        | 5.4E-4 (1.5E-3)        | 1.3E-2 (5.1E-2)           | 6.0E-3 (1.7E-2)           |
| As <sup>a</sup> | 3E-4             | 2.1E-3 <sup>b</sup> |        | 8.5E-6 (3.8E-5)           | 4.5E-6 (1.3E-5)           | 1.6E-5 (6.6E-5)        | 7.8E-6 (2.2E-5)        | 3.2E-6 (1.3E-5)           | 1.5E-6 (4.3E-6)           |
| Se              | 5E-3             | 5.7E-3              | 4.3E-3 | 5.5E-5 (2.5E-4)           | 2.9E-5 (8.3E-5)           | 3.2E-5 (1.3E-4)        | 1.5E-5 (4.4E-5)        | 1.6E-5 (6.7E-5)           | 7.8E-6 (2.2E-5)           |
| Sr              | 6E-1             | 1.9E-2              |        | 2.2E-4 (9.9E-4)           | 1.2E-4 (3.3E-4)           | 8.1E-4 (3.3E-3)        | 3.9E-4 (1.1E-3)        | 1.3E-4 (5.3E-4)           | 6.2E-5 (1.8E-4)           |
| Zr              | 8E-5             |                     |        | 9.4E-7 (4.2E-6)           | 5.0E-7 (1.4E-6)           | 1.8E-6 (7.3E-6)        | 8.5E-7 (2.4E-6)        | 3.0E-8 (1.2E-7)           | 1.4E-8 (4.1E-8)           |
| Mo              | 5E-3             |                     | 1.0E-2 | 5.4E-6 (2.4E-5)           | 2.8E-6 (8.1E-6)           | 2.0E-6 (7.9E-6)        | 9.3E-7 (2.7E-6)        | 4.9E-7 (2.0E-6)           | 2.3E-7 (6.6E-7)           |
| Ag              | 5E-3             |                     |        | 3.0E-6 (1.4E-5)           | 1.6E-6 (4.6E-6)           | 4.9E-5 (2.0E-4)        | 2.3E-5 (6.7E-5)        | 1.5E-4 (6.2E-4)           | 7.2E-5 (2.1E-4)           |
| Cd              | 1E-3             | 1.0E-3 <sup>b</sup> | 3.6E-4 | 2.4E-5 (1.1E-4)           | 1.3E-5 (3.7E-5)           | 6.3E-5 (2.6E-4)        | 3.0E-5 (8.6E-5)        | 7.6E-6 (3.1E-5)           | 3.6E-6 (1.0E-5)           |
| Sn              | 6E-1             | 2.0E+0              |        | 1.6E-6 (7.0E-6)           | 8.3E-7 (2.4E-6)           | 6.0E-7 (2.5E-6)        | 2.9E-7 (8.2E-7)        | 3.0E-8 (1.2E-7)           | 1.4E-8 (4.1E-8)           |
| Sb              | 4E-4             | 8.6E-4              | 8.6E-4 | 5.4E-7 (2.4E-6)           | 2.9E-7 (8.2E-7)           | 3.3E-7 (1.3E-6)        | 1.6E-7 (4.5E-7)        | 1.1E-8 (4.4E-8)           | 5.2E-9 (1.5E-8)           |
| I               | 1E-2             | 3.0E-2              | 1.0E-2 | 8.7E-5 (3.9E-4)           | 4.6E-5 (1.3E-4)           | 1.1E-3 (4.6E-3)        | 5.4E-4 (1.5E-3)        | 6.1E-5 (2.5E-4)           | 2.9E-5 (8.3E-5)           |
| Ba              | 2E-1             | 3.0E-2              | 2.9E-2 | 2.4E-5 (1.1E-4)           | 1.3E-5 (3.6E-5)           | 3.0E-5 (1.2E-4)        | 1.4E-5 (4.0E-5)        | 5.8E-4 (2.4E-3)           | 2.8E-4 (7.9E-4)           |
| La              | 5E-5             |                     |        | 1.6E-5 ( <b>7.2E-5</b> )  | 8.4E-6 (2.4E-5)           | 3.1E-6 (1.3E-5)        | 1.5E-6 (4.2E-6)        | 3.3E-7 (1.3E-6)           | 1.6E-7 (4.5E-7)           |
| W               | 8E-4             |                     |        | 1.7E-6 (7.8E-6)           | 9.2E-7 (2.6E-6)           | 6.3E-7 (2.6E-6)        | 3.0E-7 (8.6E-7)        | 9.6E-8 (3.9E-7)           | 4.6E-8 (1.3E-7)           |
| Hg              | 3E-4             | 5.7E-4              | 5.7E-4 | 6.0E-6 (2.7E-5)           | 3.2E-6 (9.1E-6)           | 1.1E-5 (4.3E-5)        | 5.0E-6 (1.4E-5)        | 6.9E-7 (2.8E-6)           | 3.3E-7 (9.3E-7)           |
| Tl              | 1E-5             |                     | 2.0E-5 | 1.0E-7 (4.5E-7)           | 5.3E-8 (1.5E-7)           | 3.7E-8 (1.5E-7)        | 1.8E-8 (5.1E-8)        | 9.9E-9 (4.0E-8)           | 4.7E-9 (1.3E-8)           |
| Pb              | 2E-3             | 3.6E-3 <sup>b</sup> |        | 1.0E-5 (4.7E-5)           | 5.5E-6 (1.6E-5)           | 2.2E-5 (8.9E-5)        | 1.0E-5 (3.0E-5)        | 5.5E-6 (2.2E-5)           | 2.6E-6 (7.5E-6)           |
| U               | 2E-4             | 8.6E-5              | 8.6E-5 | 4.2E-7 (1.9E-6)           | 2.2E-7 (6.4E-7)           | 8.7E-7 (3.5E-6)        | 4.1E-7 (1.2E-6)        | 1.4E-7 (5.6E-7)           | 6.5E-8 (1.9E-7)           |

<sup>a</sup> For inorganic As only. <sup>b</sup> Withdrawn.
